P5474

**STEMI time presentation, are circadian patterns and week hours related to the outcome?**

J.J. Rodriguez Arias, L.O. Ortega-Paz, M.M. Masotti, X.F. Freixa, A.R. Regueiro, M.S. Sabate, S.B. Brugaletta

*Hospital Clinic de Barcelona, Barcelona, Spain*

On behalf of Codi IAM investigators.

**Background:** Previous studies have suggested that patients treated during night hours had significantly longer delay times than those treated during day hours without difference in terms of in-hospital mortality. A circadian pattern can also be seen in STEMI presentation but data analyzing a relationship between this circadian pattern and prognosis are missing.

**Objective:** We aimed to evaluate clinical outcomes of STEMI patients according to the time of medical attention (on-hour vs off-hour) and to the circadian pattern.

**Methods:** Observational, multicenter study, based on prospectively collected data from consecutive patients treated within the STEMI Network during the period between January 2010 and December 2015. On-hour presentation included patients treated between 8:00h and 19:59h on weekdays, the rest were catalogued as off-hour presentation. In the circadian pattern analysis, event frequencies were analyzed by time of onset in keeping with a circular distribution over the 24-hour clock. The Rayleigh test was used to evaluate the hypothesis of a uniform distribution of times. The primary endpoint was 1-year all-cause mortality. Secondary endpoints were 30-day all-cause mortality and in-hospital complications.

**Results:** A total of 8608 patients were included, 3795 (44.1%) in on-hour group and 4813 (55.9%) in off-hour group. There were significant differences with a shorter patient delay ( $157\pm 227$ min vs.  $141\pm 193$ min;  $p<0.01$ ) and longer system delay ( $132\pm 86$  min vs.  $152\pm 111$ min;  $p<0.01$ ) in the

on-hour vs. off-hour group. However, there was no difference in total ischemic time ( $287\pm 256$  min vs.  $293\pm 242$  min;  $p=0.265$ ). At 30-day and 1-year follow-up there were no differences in adjusted all-cause mortality between groups [OR 0.91 (CI95%: 0.73–1.12;  $p=0.35$ ) and OR 0.99 (CI95%: 0.83–1.17;  $p=0.87$ ), respectively]. In-hospital atrioventricular block was more frequent in on-hour group as compared to off-hour (4.2% vs 3.3%;  $p=0.02$ ).

A circadian pattern was observed between 9:00 am and 12:30 pm, patients presenting a circadian pattern showed a shorter patient delay ( $135.29\pm 186.83$ min vs.  $152.44\pm 215.11$ min;  $p<0.01$ ), system delay ( $134.93\pm 89.36$ min vs.  $145.63\pm 104.93$ min;  $p<0.01$ ) and total ischemic time ( $270.78\pm 255.55$ min vs.  $270.34\pm 227.34$ min;  $p<0.01$ ) with no differences in 30-day and 1-year mortality between patients with or without the pattern [OR 1.02 (CI95%: 0.81–1.30;  $p=0.85$ ) and OR 1.12 (CI95%: 0.92 - 1.36;  $p=0.25$ ) respectively]. This circadian pattern was repeated each day weekly during the period of the study.

**Conclusions:** Off-hour STEMI presentation was associated with a shorter patient delay and longer system delay without an increase in total ischemic time. The off-hour presentation was not related to an increase in 1-year all-cause mortality when compared to on-hour. A circadian pattern was found, patients included in this group presented a shorter total ischemic time without differences in 30-day and 1-year mortality.

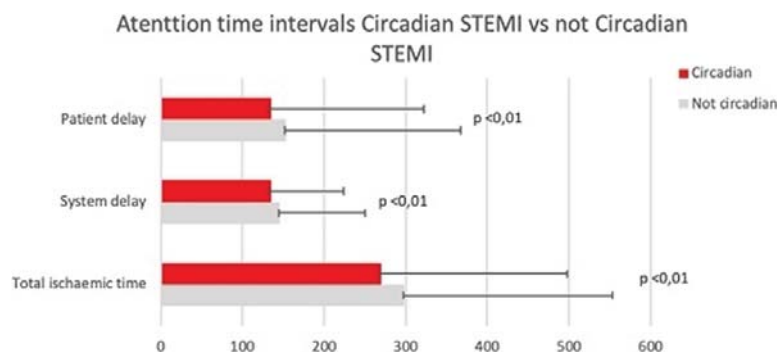

Source: http://academic.oup.com/eurheartj/article-pdf/40/Supplement_1/ehz746.0428/30202535/ehz746.0428.pdf
